# Supplementary material for: A proteomics approach to study the molecular basis of enhanced salt tolerance in barley ( Hordeum vulgare L.) conferred by the root mutualistic fungus Piriformospora indica
Source: Royal Society of Chemistry journal article supplement (doi:10.1039/c3mb70069k), 2013-03-08
Supplement: c3mb70069k.pdf [file c3mb70069k.pdf]

Supplementary Table 1. Average volume percent and standard errors of protein spots depicted in figure 5.

| <b>Spot ID</b> | <b>0 mM NaCl non-inoculated</b> | <b>0 mM NaCl inoculated</b> | <b>100 mM NaCl non-inoculated</b> | <b>100 mM NaCl inoculated</b> | <b>300 mM NaCl non-inoculated</b> | <b>300 mM NaCl inoculated</b> |
|----------------|---------------------------------|-----------------------------|-----------------------------------|-------------------------------|-----------------------------------|-------------------------------|
| <b>8</b>       | 0.081 ± 0.017                   | 0.068 ± 0.014               | 0.044 ± 0.002                     | 0.057 ± 0.004                 | 0.043 ± 0.005                     | 0.044 ± 0.003                 |
| <b>11</b>      | 0.051 ± 0.010                   | 0.018 ± 0.009               | 0.068 ± 0.022                     | 0.045 ± 0.004                 | 0.020 ± 0.009                     | 0.034 ± 0.012                 |
| <b>66</b>      | 0.103 ± 0.029                   | 0.077 ± 0.007               | 0.174 ± 0.054                     | 0.157 ± 0.015                 | 0.162 ± 0.033                     | 0.212 ± 0.038                 |
| <b>95</b>      | 0.036 ± 0.005                   | 0.033 ± 0.005               | 0.043 ± 0.006                     | 0.058 ± 0.006                 | 0.051 ± 0.004                     | 0.060 ± 0.007                 |
| <b>117</b>     | 0.013 ± 0.005                   | 0.010 ± 0.004               | 0.017 ± 0.002                     | 0.017 ± 0.007                 | 0.041 ± 0.016                     | 0.021 ± 0.003                 |
| <b>119</b>     | 0.020 ± 0.004                   | 0.015 ± 0.005               | 0.027 ± 0.002                     | 0.029 ± 0.004                 | 0.030 ± 0.004                     | 0.030 ± 0.005                 |
| <b>122</b>     | 0.025 ± 0.008                   | 0.025 ± 0.004               | 0.033 ± 0.006                     | 0.051 ± 0.004                 | 0.046 ± 0.000                     | 0.038 ± 0.003                 |
| <b>140</b>     | 0.041 ± 0.007                   | 0.041 ± 0.010               | 0.047 ± 0.003                     | 0.078 ± 0.006                 | 0.058 ± 0.004                     | 0.059 ± 0.012                 |
| <b>205</b>     | 0.033 ± 0.005                   | 0.030 ± 0.008               | 0.073 ± 0.019                     | 0.081 ± 0.011                 | 0.065 ± 0.009                     | 0.076 ± 0.011                 |
| <b>219</b>     | 0.026 ± 0.011                   | 0.023 ± 0.002               | 0.051 ± 0.006                     | 0.047 ± 0.011                 | 0.136 ± 0.033                     | 0.127 ± 0.005                 |
| <b>301</b>     | 0.076 ± 0.013                   | 0.071 ± 0.002               | 0.090 ± 0.010                     | 0.123 ± 0.025                 | 0.140 ± 0.020                     | 0.144 ± 0.017                 |
| <b>473</b>     | 0.035 ± 0.004                   | 0.032 ± 0.005               | 0.053 ± 0.007                     | 0.046 ± 0.008                 | 0.078 ± 0.019                     | 0.037 ± 0.003                 |
| <b>606</b>     | 0.120 ± 0.006                   | 0.107 ± 0.016               | 0.082 ± 0.010                     | 0.120 ± 0.017                 | 0.071 ± 0.010                     | 0.093 ± 0.019                 |
| <b>621</b>     | 0.021 ± 0.003                   | 0.035 ± 0.006               | 0.032 ± 0.006                     | 0.051 ± 0.005                 | 0.087 ± 0.013                     | 0.095 ± 0.025                 |
| <b>968</b>     | 0.015 ± 0.004                   | 0.012 ± 0.005               | 0.029 ± 0.006                     | 0.026 ± 0.009                 | 0.022 ± 0.002                     | 0.034 ± 0.005                 |
| <b>817</b>     | 0.011 ± 0.001                   | 0.016 ± 0.003               | 0.007 ± 0.001                     | 0.010 ± 0.003                 | 0.007 ± 0.001                     | 0.010 ± 0.001                 |
| <b>884</b>     | 0.030 ± 0.003                   | 0.031 ± 0.003               | 0.021 ± 0.002                     | 0.027 ± 0.001                 | 0.021 ± 0.004                     | 0.019 ± 0.003                 |
| <b>928</b>     | 0.027 ± 0.001                   | 0.024 ± 0.003               | 0.047 ± 0.019                     | 0.032 ± 0.007                 | 0.059 ± 0.006                     | 0.039 ± 0.006                 |

Supplementary Table 2. Protein spot quantification including average volume percent and standard errors as depicted in figure 6.

| Spot ID | 0 mM NaCl non-inoculated | 0 mM NaCl Inoculated | 300 mM NaCl non-inoculated | 300 mM NaCl Inoculated | Spot ID | 0 mM NaCl non-inoculated | 0 mM NaCl Inoculated | 300 mM NaCl non-inoculated | 300 mM NaCl Inoculated |
|---------|--------------------------|----------------------|----------------------------|------------------------|---------|--------------------------|----------------------|----------------------------|------------------------|
| 1       | 0.414 ± 0.031            | 0.357 ± 0.036        | 0.226 ± 0.044              | 0.325 ± 0.023          | 412     | 0.042 ± 0.002            | 0.039 ± 0.008        | 0.053 ± 0.007              | 0.064 ± 0.010          |
| 8       | 0.081 ± 0.012            | 0.068 ± 0.010        | 0.043 ± 0.005              | 0.044 ± 0.003          | 413     | 0.105 ± 0.009            | 0.103 ± 0.005        | 0.077 ± 0.008              | 0.162 ± 0.018          |
| 11      | 0.051 ± 0.010            | 0.018 ± 0.009        | 0.020 ± 0.009              | 0.034 ± 0.012          | 441     | 0.045 ± 0.008            | 0.040 ± 0.007        | 0.019 ± 0.004              | 0.022 ± 0.005          |
| 57      | 0.108 ± 0.007            | 0.099 ± 0.013        | 0.212 ± 0.049              | 0.176 ± 0.024          | 447     | 0.015 ± 0.004            | 0.013 ± 0.003        | 0.031 ± 0.006              | 0.021 ± 0.002          |
| 66      | 0.103 ± 0.029            | 0.077 ± 0.007        | 0.162 ± 0.033              | 0.212 ± 0.038          | 461     | 0.067 ± 0.005            | 0.067 ± 0.003        | 0.037 ± 0.004              | 0.056 ± 0.007          |
| 95      | 0.036 ± 0.005            | 0.033 ± 0.005        | 0.051 ± 0.004              | 0.060 ± 0.007          | 473     | 0.035 ± 0.004            | 0.032 ± 0.005        | 0.078 ± 0.019              | 0.037 ± 0.003          |
| 117     | 0.013 ± 0.005            | 0.010 ± 0.004        | 0.041 ± 0.016              | 0.021 ± 0.003          | 521     | 0.051 ± 0.003            | 0.058 ± 0.002        | 0.079 ± 0.009              | 0.076 ± 0.006          |
| 119     | 0.020 ± 0.004            | 0.015 ± 0.005        | 0.030 ± 0.004              | 0.030 ± 0.005          | 527     | 0.085 ± 0.011            | 0.098 ± 0.009        | 0.049 ± 0.008              | 0.055 ± 0.006          |
| 122     | 0.025 ± 0.008            | 0.025 ± 0.004        | 0.046 ± 0.000              | 0.038 ± 0.003          | 549     | 0.073 ± 0.008            | 0.093 ± 0.007        | 0.043 ± 0.009              | 0.062 ± 0.011          |
| 125     | 0.051 ± 0.005            | 0.051 ± 0.010        | 0.088 ± 0.009              | 0.091 ± 0.011          | 606     | 0.120 ± 0.006            | 0.107 ± 0.016        | 0.071 ± 0.010              | 0.093 ± 0.019          |
| 166     | 0.089 ± 0.011            | 0.119 ± 0.012        | 0.053 ± 0.019              | 0.083 ± 0.014          | 621     | 0.021 ± 0.003            | 0.035 ± 0.006        | 0.087 ± 0.013              | 0.095 ± 0.025          |
| 205     | 0.033 ± 0.005            | 0.030 ± 0.008        | 0.065 ± 0.009              | 0.076 ± 0.011          | 636     | 0.017 ± 0.003            | 0.017 ± 0.001        | 0.027 ± 0.002              | 0.045 ± 0.009          |
| 219     | 0.026 ± 0.011            | 0.023 ± 0.002        | 0.136 ± 0.033              | 0.127 ± 0.005          | 665     | 0.076 ± 0.003            | 0.087 ± 0.007        | 0.053 ± 0.002              | 0.081 ± 0.009          |
| 221     | 0.034 ± 0.005            | 0.038 ± 0.004        | 0.023 ± 0.007              | 0.040 ± 0.004          | 681     | 0.044 ± 0.007            | 0.059 ± 0.008        | 0.028 ± 0.002              | 0.043 ± 0.007          |
| 247     | 0.024 ± 0.005            | 0.020 ± 0.005        | 0.022 ± 0.003              | 0.013 ± 0.002          | 691     | 0.203 ± 0.018            | 0.250 ± 0.043        | 0.095 ± 0.029              | 0.142 ± 0.017          |
| 253     | 0.043 ± 0.009            | 0.038 ± 0.007        | 0.013 ± 0.002              | 0.025 ± 0.002          | 791     | 0.039 ± 0.012            | 0.071 ± 0.006        | 0.102 ± 0.019              | 0.073 ± 0.027          |
| 301     | 0.076 ± 0.013            | 0.071 ± 0.002        | 0.140 ± 0.020              | 0.144 ± 0.017          | 814     | 0.076 ± 0.008            | 0.082 ± 0.005        | 0.045 ± 0.011              | 0.059 ± 0.009          |
| 325     | 0.081 ± 0.008            | 0.070 ± 0.015        | 0.114 ± 0.015              | 0.122 ± 0.026          | 817     | 0.011 ± 0.001            | 0.016 ± 0.003        | 0.007 ± 0.001              | 0.010 ± 0.001          |
| 338     | 0.117 ± 0.005            | 0.114 ± 0.012        | 0.053 ± 0.002              | 0.104 ± 0.010          | 903     | 0.035 ± 0.009            | 0.053 ± 0.005        | 0.024 ± 0.004              | 0.052 ± 0.012          |
| 339     | 0.045 ± 0.006            | 0.035 ± 0.003        | 0.020 ± 0.003              | 0.025 ± 0.002          | 928     | 0.027 ± 0.001            | 0.024 ± 0.003        | 0.059 ± 0.006              | 0.039 ± 0.006          |
| 342     | 0.031 ± 0.005            | 0.036 ± 0.004        | 0.061 ± 0.006              | 0.056 ± 0.011          | 947     | 0.182 ± 0.043            | 0.234 ± 0.052        | 0.125 ± 0.027              | 0.250 ± 0.018          |
| 352     | 0.050 ± 0.006            | 0.042 ± 0.005        | 0.073 ± 0.009              | 0.083 ± 0.017          | 946     | 0.143 ± 0.021            | 0.136 ± 0.015        | 0.082 ± 0.007              | 0.168 ± 0.025          |
| 377     | 0.052 ± 0.005            | 0.049 ± 0.004        | 0.075 ± 0.012              | 0.080 ± 0.006          | 968     | 0.015 ± 0.004            | 0.012 ± 0.005        | 0.022 ± 0.002              | 0.034 ± 0.005          |

Supplementary Table 3. List of average percentage proteins showing difference in amount between *Piriformospora indica*-colonized and non-inoculated plants under control (0 mM NaCl).

| Spot ID <sup>a</sup> | pI/MW (kDa)       |                   | gene no. <sup>d</sup> | Score/<br>%Cov. <sup>e</sup> | MS/MS<br>-MS <sup>f</sup> | Best matching gene product                      |
|----------------------|-------------------|-------------------|-----------------------|------------------------------|---------------------------|-------------------------------------------------|
|                      | Exp. <sup>b</sup> | The. <sup>c</sup> |                       |                              |                           |                                                 |
| <b>11</b>            | 6.1/13            | 5.8/13.3          | gi 132107             | 280/72                       | 11/3                      | Ribulose biphosphate carboxylase small chain    |
| <b>70</b>            | 5.2/15            | 5.3/15.9          | gi 1229138            | 424/47                       | 9/5                       | low temperature-responsive RNA-binding protein  |
| <b>200</b>           | 6.4/25            | 5.9/21.7          | gi 58500257           | 107/26                       | 4/2                       | Quinone reductase 2 [Triticum monococcum]       |
| <b>586</b>           | 5.4/41            | 6.8/40.8          | gi 195644252          | 160/16                       | 4/2                       | Aspartate-semialdehyde dehydrogenase [Zea mays] |
| <b>795</b>           | 6/40              | 5.7/41.7          | gi 162463414          | 156/29                       | 4/2                       | Atin [Phaseolus vulgaris]                       |
| <b>810</b>           | 5.5/76            | 5.3/70.7          | gi 27476086           | 218/24                       | 15/5                      | Putative heat shock 70 KD protein               |

a) The numbering corresponds to the 2-D gel in Figure 4. b) Experimental pI and MW. c) Theoretical pI and MW. d) gi number in Gene Bank. e) MASCOT score and percent coverage resulted from combined MS-MS/MS search. f) Number of peptide identified by PMF and MS/MS
